# Supplementary material for: Ultraflexible and Mechanically Strong Polymer/Polyaniline Conductive Interpenetrating Nanocomposite via In Situ Polymerization of Vinyl Monomer
Source: MDPI journal article supplement (doi:10.3390/polym13132159), 2021-06-30
Supplement: s1 [file s1]

## **Supporting information**

### **Ultraflexible and mechanically strong polymer/polyaniline conductive interpenetrating nanocomposite via in situ polymerization of vinyl monomer**

Haihua Wang\*, Xiaojing Wu, Xuan Qin, Guiqiang Fei\*, Liyu Sun, Yanyu Li, Mengxi Wang

*Shaanxi Key Laboratory of Chemical Additives for Industry, College of Chemistry and Chemical Engineering,*

*Shaanxi University of Science and Technology, Xi'an, Shaanxi, 710021, PR China*

Table S1 Performance comparison for polyaniline composites reported in this work and literatures

| Materials                                                           | Electrical conductivity(S/cm) | Tensile strength (MPa) | Refs.     |
|---------------------------------------------------------------------|-------------------------------|------------------------|-----------|
| Nanostructured polyaniline-clay composite/Polystyrene               | 0.00076                       | 70.6                   | [1]       |
| Polyaniline/Polyacrylate                                            | 0.10                          | 3.31                   | [2]       |
| Polyethylene terephthalate/polyaniline                              | 0.76                          | -                      | [3]       |
| Polyaniline-clay nanocomposite/3-pentadecyl phenol 4-sulphonic acid | 0.63                          | 17.2                   | [4]       |
| GPANI-PMB                                                           | 2.8                           | 43.54                  | This work |

Table S2 Resistivity of nanocomposite films measured by four probe technique under different bending conditions

| Folding times<br>Samples | 0     | 20    | 40    | 60    | 80    | 100   | 120   | 140   | 160   | 180   | 200   |
|--------------------------|-------|-------|-------|-------|-------|-------|-------|-------|-------|-------|-------|
| GPANI-PMB1               | 0.529 | 0.532 | 0.538 | 0.538 | 0.541 | 0.543 | 0.543 | 0.546 | 0.550 | 0.552 | 0.555 |
| GPANI-PMB2               | 0.476 | 0.478 | 0.481 | 0.483 | 0.483 | 0.485 | 0.488 | 0.488 | 0.490 | 0.490 | 0.493 |
| GPANI-PMB3               | 0.357 | 0.358 | 0.358 | 0.360 | 0.361 | 0.361 | 0.362 | 0.364 | 0.364 | 0.365 | 0.366 |
| GPANI-PMB4               | 0.452 | 0.455 | 0.457 | 0.459 | 0.459 | 0.461 | 0.463 | 0.467 | 0.470 | 0.470 | 0.472 |
| GPANI-PMB5               | 0.559 | 0.562 | 0.565 | 0.568 | 0.568 | 0.571 | 0.578 | 0.581 | 0.581 | 0.588 | 0.592 |
| GPANI/PMB3               | 166.7 | 166.7 | 169.5 | 175.4 | 178.6 | 188.7 | 204.1 | 222.2 | 250   | 263.2 | 277.8 |

## References

- 1 Jds A.; Ss A.; Kp C.; et al. Development of electromagnetic shielding materials from the conductive blends of polystyrene polyaniline-clay nanocomposite. *Compos. Part A, Appl. Sci. Manuf.* **2010**, 41, 1647-1652.
- 2 A L W.; A Y G.; A L Z.; et al. Enhanced electrical conductivity and competent mechanical properties of polyaniline/polyacrylate (PANI/PA) composites for antistatic finishing prepared at the aid of polymeric stabilizer. *Prog. Org. Coat.* **2018**, 125, 99-108.
- 3 Zhang Y, Pan T, Yang Z. Flexible polyethylene terephthalate/polyaniline composite paper with bending durability and effective electromagnetic shielding performance. *Chem. Eng. J.* **2020**, 389, 124433.
- 4 Sudha J.D.; Sivakala S.; Prasanth R.; et al. Development of electromagnetic shielding materials from the conductive blends of polyaniline and polyaniline-clay nanocomposite-EVA: Preparation and properties. *Compos. Sci. Technol.* **2009**, 69, 358-364.
